# Supplementary material
Source: HighWire-hosted journal article supplement (https://cmajopen.ca/highwire/filestream/80801/field_highwire_adjunct_files/1/open-2014-0067-original-submission.pdf)
Supplement: open-2014-0067-original-submission.pdf [file open-2014-0067-original-submission.pdf]

# The Quality of Hyperacute Ischemic Stroke Treatment in Canada

Ganesh A, Camden M, Lindsay P, Kapral MK, Cote R, Fang J, Zagorski B, Hill MD for the Canadian Stroke Audit Group

From the Calgary Stroke Program, Department of Clinical Neurosciences, Hotchkiss Brain Institute, University of Calgary, Calgary, AB, Canada

## Correspondence to:

Michael D. Hill, Professor, Calgary Stroke Program, Department of Clinical Neurosciences, University of Calgary, Foothills Hospital, Rm 1242A, 1403 29<sup>th</sup> Street NW, Calgary, Alberta, T2N 2T9, Canada  
FAX 403 283 2270; EMAIL michael.hill@ucalgary.ca

## Acknowledgements and Funding:

The study was funded by the Canadian Stroke Network and the Heart & Stroke Foundation of Canada

## Conflicts of interest:

None.

## Statement of Authorship:

AG and MDH wrote the first draft.  
PL operationally organized and administered the study.  
All authors contributed to analysis, discussion and critical revision of the final manuscript.

Full title: The Quality of Hyperacute Ischemic Stroke Treatment in Canada

Cover title: The Quality of Hyperacute Ischemic Stroke Treatment in Canada

Keywords: stroke, thrombolysis, quality care, stroke centre

Word Count: 250 (abstract); 1737 (text)

Figures: 0

Tables: 4

1  
2  
3 Abstract

4  
5 **Background** – The use of thrombolysis in acute stroke is an important indicator of the quality of  
6 stroke care, as it requires healthcare providers to work collaboratively, rapidly, and accurately to  
7 optimize patient outcome. We conducted a national chart audit to assess the quality of acute  
8 stroke care in Canada, using the rate of thrombolysis as the key indicator.  
9

10  
11 **Methods** – National administrative data were used to identify discharge diagnoses of stroke in  
12 the 10 provinces between 2008 and 2009, and a weighted random sample was drawn for detailed  
13 chart review, focused on identifying indicators of acute stroke care. The proportion of  
14 thrombolysis use, complications, and outcomes were determined, with rates adjusted for age and  
15 sex, and stratified by hospital type.  
16

17  
18 **Results** – The final audit sample included 9,588 patient charts representing 88% of the 43,651  
19 admitted stroke cases in Canada. A total of 5.4% (95% confidence interval [CI] 5.1-5.6) of all  
20 stroke and 6.1% (95% CI 5.8-6.4) of ischemic stroke patients received thrombolysis, with  
21 comprehensive stroke centres treating roughly one-third of their ischemic cases – double that of  
22 primary stroke centres. Most often, 35-49% of the time, thrombolysis was not given due to stroke  
23 onset-to-arrival time beyond 4.5 hours.  
24

25  
26 **Interpretation** – Thrombolysis rates for acute stroke in Canada remain low, limited by delays in  
27 both the arrival of patients to hospital, and in the in-hospital processes of neuroimaging and  
28 thrombolysis administration. Our data demonstrates the critical need for concerted national  
29 efforts to improve education regarding acute stroke treatment and speed up in-hospital stroke  
30 management.  
31  
32  
33  
34  
35  
36  
37  
38  
39  
40  
41  
42  
43  
44  
45  
46  
47  
48  
49  
50  
51  
52  
53  
54  
55  
56  
57  
58  
59  
60

## Introduction

The evidence-to-practice gap in acute stroke treatment is thought to be large on a population basis. While treatments have evolved rapidly, uptake and application of these treatments has been slow and inconsistent [1]. The use of thrombolysis for acute ischemic stroke is an important quality indicator. The rates of acute thrombolysis use in the United States [2], Ireland [3], the United Kingdom [4], and Sweden [5] represent only a small fraction of the total ischemic stroke population.

The demonstration that thrombolysis for stroke is an effective treatment has wrought much system change. Although there is unequivocal evidence for the benefit of timely thrombolysis [6], it is a difficult therapy to administer appropriately, in large part because of the tremendous need for speed in application and careful clinical judgement [7]. Teams of health care providers must work in concert, very rapidly, making the correct decisions to achieve good outcomes. Results from Helsinki have shown that very fast treatment times are possible, but these are dependent on a well-functioning global system pushing data collection into the pre-hospital phase, and direct linkage of the pre-hospital and in-hospital response teams [8]. Prior Canadian data showed a low rate of thrombolysis and slow treatment times [9].

We sought to assess the quality of acute stroke care in Canada by conducting a national chart audit. The key indicator was the rate of stroke thrombolysis.

## Methods

Subjects were identified using national administrative data sources. All patients with a discharge diagnosis of stroke admitted in the fiscal year, April 1, 2008 to March 31, 2009 were eligible for inclusion in the study. The diagnosis of stroke was considered using the following codes from the International Statistical Classification of Diseases and Related Health Problems, 10<sup>th</sup> Revision (ICD-10): I60, I61, I63, I64, G45 [10]. Only the most responsible or first position diagnosis was considered.

We only included the 10 Canadian provinces in this sample, excluding the 3 territories due to their small populations. Privacy assessments and ethical board reviews were conducted in each province. We drew a weighted random sample for detailed chart review for all the provinces, with the exception of Manitoba, where the sample was non-random and obtained from two regions, including seven hospitals, at the discretion of the provincial health authority. Sampling was over-weighted for smaller provinces and under-represented populations. Each hospital was classified as a “Comprehensive Stroke Centre” or a “Primary Stroke Centre”, if they contained the specific elements for such designations published in the literature, or as “Other” if they did not satisfy the criteria for either special designation [11 12]. Hospitals with fewer than 20 stroke admissions per year were excluded.

Charts were audited through on-site review by 51 trained chart abstractors. Each chart was reviewed to obtain details of patient demographics, pre-stroke independence, cardiovascular comorbidities, severity of neurological deficits, as well as indicators of acute stroke care. These indicators included whether or not the patient received thrombolysis, arrival by ambulance, as

1  
2  
3 well as the time from onset of symptoms and presentation to hospital, to receiving a Computed  
4 Tomography (CT) scan or thrombolytic treatment. Outcome indicators were in-hospital death at  
5  
6 7 and 30 days, hemorrhagic transformation, and length of stay in hospital. If a patient with acute  
7  
8 stroke did not receive thrombolysis, the reasons for non-treatment were recorded whenever  
9  
10 available.  
11  
12  
13  
14  
15  
16

17 Data were recorded on-line, stored in a secure central database, de-identified, and pooled  
18  
19 anonymously. In Ontario, results were combined with an internal chart review. Data cleaning  
20  
21 was performed with removal of duplicate charts, cases where more than 30% of the audit data  
22  
23 were missing, and where a most responsible diagnosis was not documented. Analyses were  
24  
25 performed using standard descriptive statistics. A statistical weighted adjustment was applied to  
26  
27 the audit results, based on hospital stroke volumes and the number of charts sampled, to avoid  
28  
29 potential bias resulting from unequal sampling and to ensure that the results were representative  
30  
31 of stroke care across Canadian hospitals. Rates were adjusted for age and sex using the direct  
32  
33 method to the 2001 Canadian census [13]. Adjustment for co-morbidities used the Charlson  
34  
35 index, stratified into 3 categories (0, 1, 2 or more comorbid diagnoses) [14]. We report the  
36  
37 proportion of thrombolysis use, complications, and outcomes stratified by hospital type.  
38  
39  
40  
41  
42  
43  
44  
45

## 46 **Results**

47 We reviewed 10,130 charts from the ten Canadian provinces. Of all the hospitals identified in  
48  
49 each province that admitted stroke patients in 2008-2009 (623 hospitals in total), 295 hospitals  
50  
51 were included in the audit (Table 1a). Amongst the 623 identified hospitals there were 43,651  
52  
53 admitted cases of stroke in Canada in 2008-2009. 9,588 patient charts from 295 hospitals were  
54  
55  
56  
57  
58  
59  
60

1  
2  
3 included in the audit sample, which represented 22% of the total stroke cases, and these  
4  
5 remained in the final data-set following data cleaning. After applying the weighting adjustment,  
6  
7  
8 the total audit sample represented 38,206 cases, or 88% of the total stroke cases.  
9

10  
11  
12 A total of 5.4% (95% confidence interval [CI] 5.1-5.6) of all stroke and 6.1% (95% CI 5.8-6.4)  
13  
14 of ischemic stroke patients received thrombolysis in Canada (Table 1b). The patient  
15  
16 characteristics for this thrombolysed group are recorded in Table 2. Comprehensive stroke  
17  
18 centres treated approximately one third of the ischemic stroke patients and provided a  
19  
20 thrombolysis rate double that of primary stroke centres. Most patients who were thrombolysed  
21  
22 arrived by ambulance. Interval times were slow and are shown in Table 2. Outcomes for  
23  
24 thrombolysed patients are shown in Table 3. Overall, 13.6% of thrombolysis recipients were  
25  
26 deceased at 30 days. 7.3% developed hemorrhagic transformation and the average length of stay  
27  
28 was 16 days. The most common reason for not giving thrombolysis was stroke onset-to-arrival  
29  
30 time beyond 4.5 hours – this accounted for 42.3% of non-thrombolysed cases nationally (Table  
31  
32  
33  
34  
35  
36  
37  
38  
39  
40  
41  
42  
43  
44  
45  
46  
47  
48  
49  
50  
51  
52  
53  
54  
55  
56  
57  
58  
59  
60  
4).

### 41 **Interpretation**

42  
43 In this national chart audit, we used a comprehensive estimate of the total stroke volume in  
44  
45 Canada and then carefully reviewed charts to estimate the rate of thrombolysis for acute stroke.  
46  
47  
48 Stroke thrombolysis rates were low overall, higher at comprehensive stroke centres, and most  
49  
50 often limited by a delayed presentation to hospital.  
51  
52  
53  
54  
55  
56  
57  
58  
59  
60

1  
2  
3 Calculation of thrombolysis rates has been widely varied by jurisdiction and therefore difficult to  
4  
5 compare across centres and internationally, most often because the denominator of total stroke  
6  
7 cases is variably estimated [2-5]. Approximately a quarter of patients not thrombolysed, were  
8  
9 noted to be too mild to offer treatment. This is similar to data from a decade ago [15]. Yet,  
10  
11 approximately a third of these patients will end up dead or disabled [15 16], indicating that some  
12  
13 of these patients could also have been treated.  
14  
15  
16  
17  
18  
19

20 Our results demonstrate that the major barrier to thrombolysis remains getting patients to the  
21  
22 hospital rapidly. Even at comprehensive stroke centres where most patients arrive by  
23  
24 ambulance, and thus present with a presumed stroke diagnosis allowing for activation of “stroke  
25  
26 code” or “brain attack” pathways, the mean onset-to-arrival time is slightly more than 3 hours.  
27  
28 Improving access at this level is challenging for a number of reasons. First, the disease itself  
29  
30 renders patients incapable of seeking help, and stroke typically does not hurt and does not  
31  
32 uniformly engender a sense of urgency for treatment [17]. In addition, the public often does not  
33  
34 know how to recognize stroke in another person and seek help [18]. Furthermore, the vast  
35  
36 geography of Canada limits the speed of access for those in rural areas.  
37  
38  
39  
40  
41  
42

43 A more easily remedial barrier to timely thrombolysis is the marked delay in in-hospital  
44  
45 processes. Mean times from door-to-imaging and imaging-to-treatment are very long. Current  
46  
47 guidelines recommend that all patients be treated within 60 minutes of arrival [19]. It is  
48  
49 estimated that for every minute the middle cerebral artery remains blocked, 1.9 million neurons  
50  
51 and 12km of axons are destroyed [20]. In Helsinki, median door-to-needle times of 20 minutes  
52  
53 have been demonstrated [8]. Compared to average Canadian times which are 100 minutes longer,  
54  
55  
56  
57  
58  
59  
60

1  
2  
3 we can expect that Canadian thrombolysis patients will fare substantially worse than Finnish  
4 patients. Fortunately, improving in-hospital processes – door-to-treatment time – is much more  
5 feasible since they are in the control of a relatively small number of individuals. Canada has  
6 made progress in this regard in the last decade. Following the publication of the CASES study  
7 [9], which provided a framework for the development of acute stroke protocols across Canada,  
8 and the first Canadian Best Practice Recommendations for Stroke Care [21], which highlighted  
9 the need for emergent treatment in cases presenting within 4.5 hours, selected Canadian centres  
10 have achieved substantial improvements in their door-to-treatment times [22-24].  
11  
12  
13  
14  
15  
16  
17  
18  
19  
20  
21  
22  
23

24 An important limitation of our study is that we relied on hospital administrative data to estimate  
25 the total number of stroke cases in Canada. However, we believe that such data do not capture all  
26 strokes that occur in Canada; patients that do not encounter the hospital system would not be  
27 included in this number. Thus, our denominator for estimating the proportion of thrombolysed  
28 cases, was likely underestimated. In assessing time to treatment, we did not distinguish  
29 intravenous from endovascular thrombolysis; at selected comprehensive stroke centres,  
30 endovascular treatment may have been offered at later time windows, increasing mean treatment  
31 times.  
32  
33  
34  
35  
36  
37  
38  
39  
40  
41  
42  
43  
44  
45

46 The chief strength of our study was the comprehensive sampling strategy used to examine a  
47 national and population-based estimate of stroke thrombolysis in Canada. Since all thrombolysis  
48 patients in Canada are admitted to hospital, we believe that we have captured a comprehensive  
49 numerator of all thrombolysed stroke patients in determining the national thrombolysis rate.  
50  
51  
52  
53  
54  
55  
56  
57  
58  
59  
60



1  
2  
3  
4  
5  
6  
7  
8  
9  
10  
11  
12  
13  
14  
15  
16  
17  
18  
19  
20  
21  
22  
23  
24  
25  
26  
27  
28  
29  
30  
31  
32  
33  
34  
35  
36  
37  
38  
39  
40  
41  
42  
43  
44  
45  
46  
47  
48  
49  
50  
51  
52  
53  
54  
55  
56  
57  
58  
59  
60

It is not known what an expected maximal thrombolysis rate should be, but it is estimated that up to 24% of stroke patients are eligible for thrombolytic treatment if delays between onset and admission to hospital are avoided [25]. Stroke thrombolysis decision-making requires careful judgement of the degree of disability and estimate of treatment risk; this expertise is not readily available at all Canadian hospitals. Whereas comprehensive stroke centres demonstrated higher thrombolysis rates in our study, they only serve approximately one third of the stroke population. Therefore, in addition to training stroke neurologists, an emphasis on the education of primary urgent and/or emergency care physicians regarding acute stroke treatment is critical to optimize both the thrombolysis rate and speed of treatment. The centralization of stroke systems of care, known to be of benefit [26 27], is happening in Canada, with a number of centers achieving Stroke Distinction with Accreditation Canada [28], but this has not yet translated into an improvement in the speed of treatment. Ultimately, current interval times represent a persistent and unacceptable evidence-to-practice gap and clearly indicate that our stroke systems of care require a concerted effort to improve.

Table 1a – Number of hospitals and stroke patients captured in the national chart audit for the 10 Canadian provinces (2008-2009)

|                             | <i>Total<br/>Hospitals</i> | <i>Stroke<br/>Admissions<br/>2008-09</i> | <i>Eligible<br/>Audit<br/>Hospitals</i> | <i>Stroke<br/>Admissions<br/>(Eligible<br/>Hospitals)</i> | <i>Final<br/>Audit<br/>Sample</i> |
|-----------------------------|----------------------------|------------------------------------------|-----------------------------------------|-----------------------------------------------------------|-----------------------------------|
| <b>British Columbia</b>     | 81                         | 5690                                     | 46                                      | 5446                                                      | 1198                              |
| <b>Alberta</b>              | 88                         | 3668                                     | 22                                      | 3194                                                      | 880                               |
| <b>Saskatchewan</b>         | 61                         | 1787                                     | 13                                      | 1385                                                      | 271                               |
| <b>Manitoba</b>             | 57                         | 1633                                     | 7                                       | 1030                                                      | 231                               |
| <b>Ontario</b>              | 145                        | 16589                                    | 103                                     | 15076                                                     | 2567                              |
| <b>Quebec</b>               | 101                        | 10633                                    | 66                                      | 8769                                                      | 1621                              |
| <b>New Brunswick</b>        | 22                         | 1419                                     | 12                                      | 1293                                                      | 1007                              |
| <b>Nova Scotia</b>          | 31                         | 1191                                     | 12                                      | 1108                                                      | 998                               |
| <b>Prince Edward Island</b> | 7                          | 231                                      | 4                                       | 239                                                       | 212                               |
| <b>Newfoundland</b>         | 30                         | 810                                      | 10                                      | 666                                                       | 603                               |
| <b>Totals</b>               | 623                        | 43651                                    | 295                                     | 38206                                                     | 9588                              |

Table 1b – Proportion of stroke patients presenting to Canadian hospitals who received thrombolysis, stratified by hospital type (2008-2009)

|                                              | <i>n/N*</i> | <i>Thrombolysed% (CI<sub>95</sub>)</i> |
|----------------------------------------------|-------------|----------------------------------------|
| <b>All stroke</b>                            | 2049/38206  | 5.4 (5.1-5.6)                          |
| <b>Ischemic stroke type only<sup>§</sup></b> | 2049/33561  | 6.1 (5.8-6.4)                          |
| <b>Comprehensive Stroke Centre</b>           | 1364/12400  | 11.0 (10.4-11.6)                       |
| <b>Primary Stroke Centre</b>                 | 569/10008   | 5.7 (5.2-6.2)                          |
| <b>Other</b>                                 | 116/11153   | 1.0 (0.8-1.2)                          |

\*N = weighted sample

<sup>§</sup>ischemic stroke type = all stroke less hemorrhagic stroke types

Confidential

Table 2 – Clinical and treatment characteristics of Canadian patients presenting with acute stroke who received thrombolysis (2008-2009)

|                                                       | <b>Comprehensive<br/>Stroke Centre<br/>N=297<br/>N, weighted =<br/>1363.8 (66.5%)</b> | <b>Primary<br/>Stroke<br/>Centre<br/>N=162<br/>N, weighted<br/>= 569.4<br/>(27.8%)</b> | <b>Other<br/>N=21<br/>N, weighted<br/>= 116.3<br/>(5.7%)</b> | <b>All hospitals<br/>N=480<br/>N, weighted<br/>= 2049.5</b> |
|-------------------------------------------------------|---------------------------------------------------------------------------------------|----------------------------------------------------------------------------------------|--------------------------------------------------------------|-------------------------------------------------------------|
| <b>Age ≥ 70 years (%)</b>                             | 60.2                                                                                  | 55.1                                                                                   | 73.9                                                         | 59.5                                                        |
| <b>Female Sex (%)</b>                                 | 45.4                                                                                  | 45.2                                                                                   | 48.7                                                         | 45.5                                                        |
| <b>Hypertension (%)</b>                               | 67.0                                                                                  | 65.2                                                                                   | 77.3                                                         | 67.1                                                        |
| <b>Atrial fibrillation (%)</b>                        | 21.4                                                                                  | 16.7                                                                                   | 14.1                                                         | 19.7                                                        |
| <b>Diabetes mellitus (%)</b>                          | 22.0                                                                                  | 14.3                                                                                   | 15.1                                                         | 19.4                                                        |
| <b>Past stroke (%)</b>                                | 16.1                                                                                  | 23.2                                                                                   | 11.5                                                         | 17.8                                                        |
| <b>CAD (%)</b>                                        | 31.5                                                                                  | 15.5                                                                                   | 67.2                                                         | 29.1                                                        |
| <b>Current smoker (%)</b>                             | 15.5                                                                                  | 10.0                                                                                   | 36.4                                                         | 16.1                                                        |
| <b>Peripheral Vascular Disease<br/>(%)</b>            | 2.4                                                                                   | 1.3                                                                                    | 18.1                                                         | 3.0                                                         |
| <b>Pre-stroke Independence (%)</b>                    | 73.8                                                                                  | 71.5                                                                                   | 55.7                                                         | 72.1                                                        |
| <b>CNS score ≤ 8 (%)</b>                              | 70.9                                                                                  | 70.9                                                                                   | 55.7                                                         | 70.0                                                        |
| <b>Arrived by Ambulance (%)</b>                       | 96.2                                                                                  | 83.4                                                                                   | 69.7                                                         | 91.2                                                        |
| <b>Onset to Door Time (hours,<br/>mean, SE)</b>       | 3.3 (1.1)*                                                                            | 5.1 (0.8)                                                                              | 32.2 (5.7)                                                   | 5.4 (0.8)                                                   |
| <b>Door-to-CT time (hours,<br/>mean, SE)</b>          | 0.7 (0.1)                                                                             | 3.4 (2.7)                                                                              | 4.4 (---)                                                    | 1.5 (0.7)                                                   |
| <b>CT-to-treatment time<br/>(minutes, mean, SE)</b>   | 79.0 (8.6)                                                                            | 71.9 (4.9)                                                                             | 84.4 (---)                                                   | 77.2 (6.3)                                                  |
| <b>Door to Treatment time<br/>(minutes, mean, SE)</b> | 138.1 (17.7)                                                                          | 100.9 (15.3)                                                                           | 112.7 (1.9)                                                  | 121.1 (11.4)                                                |
| <b>Onset to Treatment time<br/>(hours, mean, SE)</b>  | 4.6 (1.1)                                                                             | 3.4 (0.3)                                                                              | 2.9 (0.1)                                                    | 4.2 (0.7)                                                   |

CAD = coronary artery disease, CNS = Canadian Neurological scale, CT = computed tomography, SE = Standard Error

\*Onset-to-door time statistically different among 3 groups (p<0.001). Primary centre compared to comprehensive centre (P=0.05). Other interval times not statistically different.

Table 3 – Outcomes in Canadian patients presenting with acute stroke who received thrombolysis (2008-2009)

|                                          | <i>Comprehensive<br/>Stroke Centre<br/>N=297<br/>N, weighted =<br/>1363.8 (66.5%)</i> | <i>Primary<br/>Stroke Centre<br/>N=162<br/>N, weighted =<br/>569.4 (27.8%)</i> | <i>Other<br/>N=21<br/>N, weighted =<br/>116.3 (5.7%)</i> | <i>All<br/>hospitals<br/>N=480<br/>N, weighted<br/>= 2049.5</i> | <i>P*</i> |
|------------------------------------------|---------------------------------------------------------------------------------------|--------------------------------------------------------------------------------|----------------------------------------------------------|-----------------------------------------------------------------|-----------|
| <b>In hospital death at 7 days (%)</b>   | 7.2                                                                                   | 8.3                                                                            | 5.2                                                      | 7.4                                                             | 0.45      |
| <b>In hospital death at 30 days (%)</b>  | 13.3                                                                                  | 15.1                                                                           | 10.8                                                     | 13.6                                                            | 0.36      |
| <b>Hemorrhagic transformation (%)</b>    | 8.0                                                                                   | 7.2                                                                            | ---                                                      | 7.3                                                             | 0.006     |
| <b>Length of stay in days: mean (SE)</b> | 15.7 (1.3)                                                                            | 16.7 (4.7)                                                                     | 15.7 (2.5)                                               | 16 (1.6)                                                        | 0.96      |

\*P values represent a test of proportions among 3 groups; length of stay was assessed by ANOVA. The only difference among groups was seen on hemorrhagic transformation because no hemorrhages were observed in one group with a very small sample size.

Table 4 – Reasons documented for not giving thrombolysis to patients with ischemic stroke presenting to Canadian hospitals, classified by hospital type and expressed as percentages (2008-2009)

|                                                   | <i>Comprehensive<br/>Stroke Centre</i><br><i>N=2878</i><br><i>N, weighted =<br/>11036.8</i> | <i>Primary Stroke<br/>Centre</i><br><i>N = 2707</i><br><i>N, weighted =<br/>9439.1</i> | <i>Other</i><br><i>N = 2399</i><br><i>N, weighted =<br/>11036.6</i> | <i>All Hospitals</i><br><i>N = 7984</i><br><i>N, weighted =<br/>31512.5</i> |
|---------------------------------------------------|---------------------------------------------------------------------------------------------|----------------------------------------------------------------------------------------|---------------------------------------------------------------------|-----------------------------------------------------------------------------|
| <b>Symptom onset over<br/>4.5 hours</b>           | 48.8                                                                                        | 35.3                                                                                   | 41.6                                                                | 42.3                                                                        |
| <b>Neurological deficit<br/>judged too mild</b>   | 26.6                                                                                        | 22.0                                                                                   | 24.3                                                                | 24.4                                                                        |
| <b>Neurological deficit<br/>judged too severe</b> | 3.4                                                                                         | 2.7                                                                                    | 3.5                                                                 | 3.2                                                                         |
| <b>Clear medical<br/>contraindication</b>         | 6.6                                                                                         | 4.3                                                                                    | 3.4                                                                 | 4.8                                                                         |
| <b>Delayed decision</b>                           | 0.2                                                                                         | 0.3                                                                                    | 0.3                                                                 | 0.3                                                                         |
| <b>Documented<br/>physician decision</b>          | 6.4                                                                                         | 8.0                                                                                    | 5.3                                                                 | 6.5                                                                         |
| <b>Not documented</b>                             | 20.0                                                                                        | 29.7                                                                                   | 26.9                                                                | 25.3                                                                        |

## References

1. Demaerschalk BM. Evidence-based clinical practice education in cerebrovascular disease. *Stroke* 2004;**35**(2):392-6
2. Adeoye O, Hornung R, Khatri P, Kleindorfer D. Recombinant tissue-type plasminogen activator use for ischemic stroke in the United States: a doubling of treatment rates over the course of 5 years. *Stroke* 2011;**42**(7):1952-5
3. Collins D, O'Neill D, McCormack P. Potential for treatment with thrombolysis in an Irish stroke unit. *Irish Medical Journal* 1999;**92**(1):236-8
4. Rudd A, Hoffman A, Grant R, Campbell J, Lowe D, Stroke IWPf. Stroke thrombolysis in England, Wales and Northern Ireland: how much do we do and how much do we need? *J Neurol Neurosurg Psychiatry* 2011;**82**(1):14-19
5. Asplund K, Glader E, Norrving B, Eriksson M, Collaboration R-S. Effects of extending the time window of thrombolysis to 4.5 hours: observations in the Swedish stroke register (riks-stroke). *Stroke* 2011;**42**(9):2492-7
6. Wardlaw J, Murray V, Berge E, et al. Recombinant tissue plasminogen activator for acute ischaemic stroke: an updated systematic review and meta-analysis. *Lancet* 2012;**379**(9834):2364-72
7. Eissa A, Krass I, Bajorek B. Barriers to the utilization of thrombolysis for acute ischaemic stroke. *Journal of Clinical Pharmacy and Therapeutics* 2012;**37**(4):399-409
8. Meretoja A, Strbian D, Mustanoja S, Tatlisumak T, Lindsberg PJ, Kaste M. Reducing in-hospital delay to 20 minutes in stroke thrombolysis. *Neurology* 2012 doi: 10.1212/WNL.0b013e31825d6011[published Online First: Epub Date].
9. Hill M, Buchan A, Investigators CAfSESC. Thrombolysis for acute ischemic stroke: results of the Canadian Alteplase for Stroke Effectiveness Study. *CMAJ* 2005;**172**(10):1307-10
10. International Statistical Classification of Diseases and Related Health Problems, 10th Revision. Secondary International Statistical Classification of Diseases and Related Health Problems, 10th Revision 2004. <http://apps.who.int/classifications/icd10/browse/2010/en>.
11. Alberts M, Latchaw R, Jagoda A, et al. Revised and updated recommendations for the establishment of primary stroke centers: a summary statement from the brain attack coalition. *Stroke* 2011;**42**(9):2651-65
12. Alberts M, Latchaw R, Selman W, et al. Recommendations for Comprehensive Stroke Centers - A Consensus Statement from the Brain Attack Coalition. *Stroke* 2005;**36**(7):1597-616
13. Age, Sex, Marital Status and Common-law Status, 2001 Census Technical Report Ottawa, Ontario: Statistics Canada, 2003.
14. Sundararajan V, Henderson T, Perry C, Muggivan A, Quan H, Ghali WA. New ICD-10 version of the Charlson comorbidity index predicted in-hospital mortality. *Journal of Clinical Epidemiology* 2004;**57**(12):1288-94
15. Barber PA, Zhang J, Demchuk AM, Hill MD, Buchan AM. Why are stroke patients excluded from TPA therapy? An analysis of patient eligibility. *Neurology* 2001;**56**(8):1015-20
16. Smith EE, Abdullah AR, Petkovska I, Rosenthal E, Koroshetz WJ, Schwamm LH. Poor outcomes in patients who do not receive intravenous tissue plasminogen activator because of mild or improving ischemic stroke. *Stroke* 2005;**36**(11):2497-9 doi: 10.1161/01.STR.0000185798.78817.f3[published Online First: Epub Date].
17. Langdorf M, Bearie B, Kazzi A, Blasko B, Kohl A. Patients' vs. physicians' assessments of emergencies: the prudent layperson standard. *The California Journal of Emergency Medicine* 2003;**4**(4):75-81
18. Greenlund K, Neff L, Zheng Z, et al. Low public recognition of major stroke symptoms. *American Journal of Preventive Medicine* 2003;**25**(4):315-9
19. Lindsay P, Bayley M, Hellings C, Hill MD, Woodbury E, Phillips S. Canadian Best Practice Recommendations for Stroke Care (updated 2008). *Cmaj* 2008;**179**(12):S1-S125
20. Saver JL. Time is brain--quantified. *Stroke* 2006;**37**(1):263-6 doi: 10.1161/01.STR.0000196957.55928.ab[published Online First: Epub Date].
21. Lindsay P, Bayley M, McDonald A, Graham I, Warner G, Phillips S. Toward a more effective approach to stroke: Canadian Best Practice Recommendations for Stroke Care. *CMAJ* 2008;**178**(11):1418-25
22. Hill M, Barber P, Demchuk A, et al. Building a "brain attack" team to administer thrombolytic therapy for acute ischemic stroke. *CMAJ* 2000;**162**(11):1589-93
23. Ghrooda E, Alcock S, Jackson A. Improvement in thrombolytic therapy administration in acute stroke with feedback. *Can J Neurol Sci* 2012;**39**(6):789-92

- 1
- 2
- 3
- 4 24. Mehdiratta M, Woolfenden A, Chapman K, et al. Reduction in IV t-PA door to needle times using an Acute
- 5 Stroke Triage Pathway. *Can J Neurol Sci* 2006;**33**(2):214-6
- 6 25. Boode B, Welzen V, Franke C, van Oostenbrugge R. Estimating the number of stroke patients eligible for
- 7 thrombolytic treatment if delay could be avoided. *Cerebrovasc Dis* 2007;**23**(4):294-8
- 8 26. Meretoja A, Roine R, Kaste M, et al. Effectiveness of primary and comprehensive stroke centers. PERFECT
- 9 Stroke: a nationwide observational study from Finland. *Stroke* 2010;**41**(6):1102-7
- 10 27. Foley N, Salter K, Teasell R. Specialized stroke services: a meta-analysis comparing three models of care.
- 11 *Cerebrovasc Dis* 2007;**23**(2-3):194-202
- 12 28. Stroke Distinction. Secondary Stroke Distinction 31 December 2013 2013. [http://www.accreditation.ca/stroke-](http://www.accreditation.ca/stroke-distinction)
- 13 [distinction](http://www.accreditation.ca/stroke-distinction).
- 14
- 15
- 16
- 17
- 18
- 19
- 20
- 21
- 22
- 23
- 24
- 25
- 26
- 27
- 28
- 29
- 30
- 31
- 32
- 33
- 34
- 35
- 36
- 37
- 38
- 39
- 40
- 41
- 42
- 43
- 44
- 45
- 46
- 47
- 48
- 49
- 50
- 51
- 52
- 53
- 54
- 55
- 56
- 57
- 58
- 59
- 60

Confidential
